# Supplementary material for: Highly Ordered Mesoporous Co3O4 Electrocatalyst for Efficient, Selective, and Stable Oxidation of 5‐Hydroxymethylfurfural to 2,5‐Furandicarboxylic Acid
Source: PubMed Central journal article supplement — ChemSusChem. 2021 Feb 9;14(23):5199–206. doi: 10.1002/cssc.202002762 (PMC9290726; doi:10.1002/cssc.202002762), 2021-02-09
Supplement: CSSC-14-5199-s001.pdf [file CSSC-14-5199-s001.pdf]

# ChemSusChem

## Supporting Information

### **Highly Ordered Mesoporous $\text{Co}_3\text{O}_4$ Electrocatalyst for Efficient, Selective, and Stable Oxidation of 5-Hydroxymethylfurfural to 2,5-Furandicarboxylic Acid**

Changlong Wang, Hans-Josef Bongard, Mingquan Yu, and Ferdi Schüth\*This publication is part of a collection of invited contributions focusing on “The Fuel Science Center-Adaptive Conversion Systems for Renewable Energy and Carbon Sources”. Please visit [to view all contributions](#). © 2021 The Authors. ChemSusChem published by Wiley-VCH GmbH. This is an open access article under the terms of the Creative Commons Attribution Non-Commercial NoDerivs License, which permits use and distribution in any medium, provided the original work is properly cited, the use is non-commercial and no modifications or adaptations are made.

## Contents

|                                                                                                                        |            |
|------------------------------------------------------------------------------------------------------------------------|------------|
| <b>1. General data.....</b>                                                                                            | <b>S2</b>  |
| <b>2. Characterizations of the catalysts.....</b>                                                                      | <b>S4</b>  |
| <b>3. Electrochemical oxidation of HMF.....</b>                                                                        | <b>S15</b> |
| <b>4. Characterizations of om-Co<sub>3</sub>O<sub>4</sub> catalyst after electrochemical oxidation<br/>of HMF.....</b> | <b>S21</b> |

## 1. General data:

All solvents and chemicals were used as purchased without further purifications. Chemicals: Pluronic 123 (P123, poly(ethylene glycol)-poly-(propylene glycol)-poly(ethylene glycol), EO:PO:EO = 20:70:20, average Mn ~ 5800; Sigma-Aldrich), Hydrochloric acid (HCl; 37-38%; J.T Baker), Sodium hydroxide (NaOH, reagent, pellet; VWR Chemicals), Potassium hydroxide (KOH, reagent, pellet; VWR Chemicals  $\geq 85\%$ ), 1-Butanol (99%; Alfa Aesar), Ethanol (absolute,  $\geq 99.8\%$ ; Sigma-Aldrich), Tetraethyl orthosilicate (TEOS; reagent grade, 98%; Sigma-Aldrich), 5-hydroxymethylfurfural (Sigma-Aldrich, 99%), Cobalt(II) nitrate hexahydrate ( $\text{Co}(\text{NO}_3)_2 \cdot 6\text{H}_2\text{O}$ ; ACS reagent,  $\geq 98\%$ ; Sigma-Aldrich). Prior to the synthesis, all the flasks were washed with a solution of aqua regia ( $\text{HCl}/\text{HNO}_3 = 3:1$  v/v) to remove any traces of metal residue, followed by washing with water and acetone, and finally dried at 80 °C overnight. Milli-Q water (18.2 M $\Omega$ ) was used for all the syntheses and catalysis experiments.

-- **Elemental analysis** was carried out at a commercial analysis laboratory (*Mikroanalytisches Laboratorium Kolbe Fraunhofer Institut UMSICHT, Gebäude G-Osterfelder Str. 3 D-46047 Oberhausen*) with an AAnalyst 200 **Atomic Absorption Spectrometer (AAS)**.

--**Scanning electron microscopy (SEM)** images were taken with a Hitachi S-5500 microscope. The EDX analyses were performed with an SDD-detector and software from Thermo Fisher.

--**Scanning transmission electron microscope (STEM)** images were taken with a HD 2700 ultrahigh-resolution cold field emission scanning microscope at an acceleration voltage of 200 kV. An EDAX Octane T Ultra W 200mm<sup>2</sup> SDD with TEAM-Software was attached to the instrument.

--**Transmission electron microscopy (TEM)** images of the catalysts were recorded with a Hitachi HF-2000 microscope at an acceleration voltage of 200 kV.

--**Nitrogen adsorption-desorption** measurements were performed on a NOVA 3200e instrument at 77 K. Prior to the measurements, all samples were degassed under vacuum for at least 6 h at 150 °C.

--**BET surface areas** were calculated from the data in a relative pressure range from 0.05-0.20. By using the Barrett-Joyner-Halenda (BJH) algorithm, the pore volumes and pore size distributions were derived from the adsorption branches of the isotherms (normally desorption is recommended, but the desorption branches could be influenced by the tensile strength effect). The total pore volume was estimated from the amount adsorbed at a relative pressure of 0.95 (might include a small contribution from interparticle voids).

--**X-ray powder diffraction**: Powder X-ray diffraction (XRD) patterns were recorded on a Stoe STADI P  $\theta$ - $\theta$  diffractometer operating in reflection mode with Cu  $K_{\alpha 1,2}$  radiation and a secondary graphite monochromator.

--**X-ray photoelectron spectra (XPS)**: XPS measurements were performed with a spectrometer from SPECS GmbH equipped with a PHOIBOS 150 1D-DLD hemispherical energy analyser. The monochromatized Al  $K\alpha$  X-ray source ( $E=1486.6$  eV) was operated at 14 kV and 100W. For the narrow scans, an analyzer pass energy of 20 eV was applied. The medium area mode was used as lens mode. The base pressure during the experiment in the analysis chamber was  $5 \times 10^{-10}$  mbar. To account charging effects, all spectra are referred to C 1s at 284.5 eV.

## 2. Characterization of the catalysts.

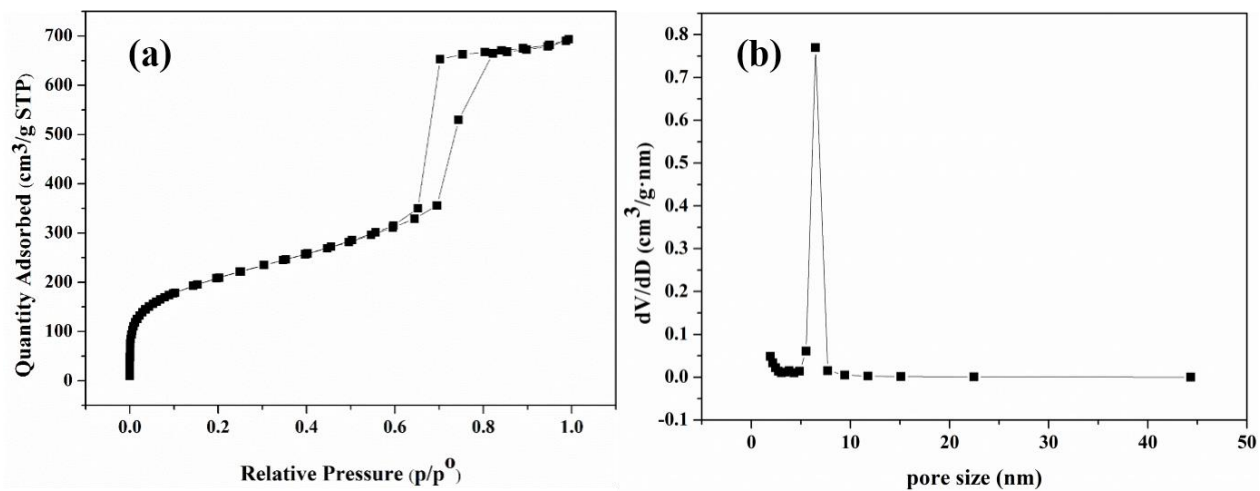

**Figure S1.** N<sub>2</sub>-physorption analysis of the KIT-6 template. a) N<sub>2</sub> adsorption-desorption isotherms and b) pore size distribution.

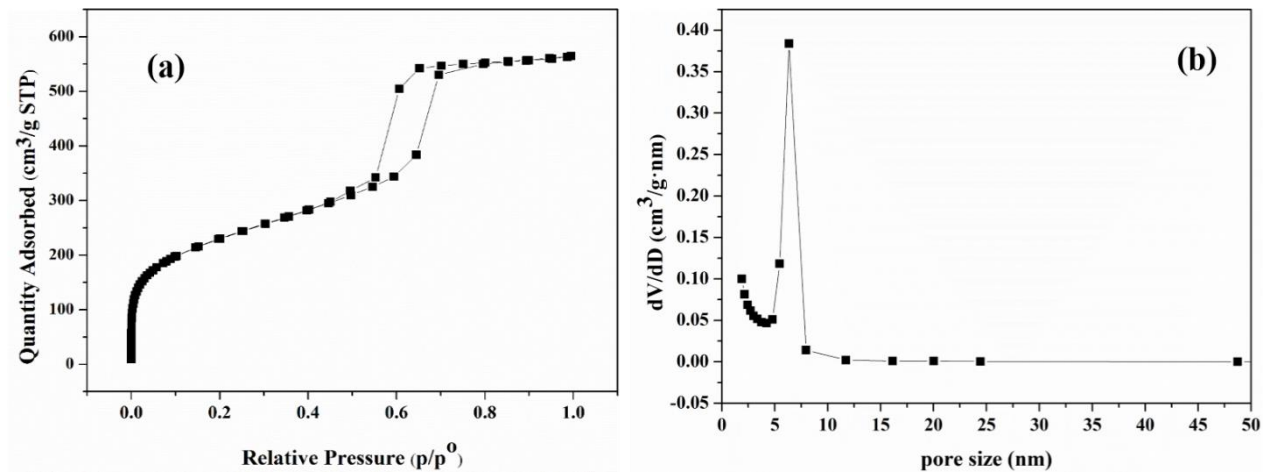

**Figure S2.** N<sub>2</sub>-physorption analysis of disordered mesoporous SiO<sub>2</sub> template. a) N<sub>2</sub> adsorption-desorption isotherms and b) pore size distribution.

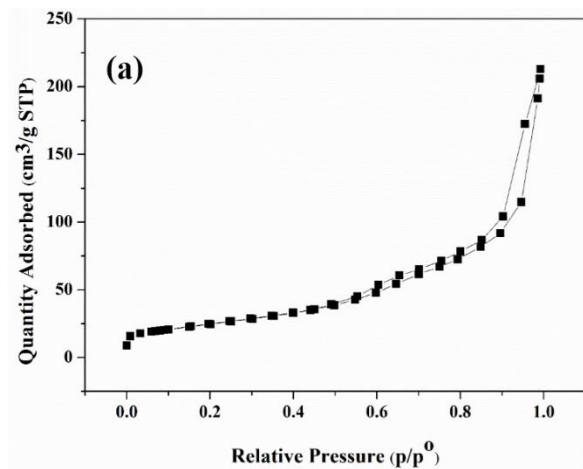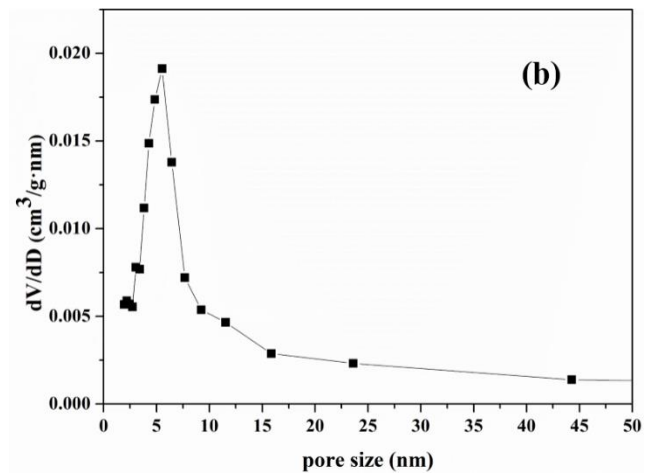

**Figure S3.**  $\text{N}_2$ -physorption analysis of  $\text{dm-Co}_3\text{O}_4$ . a)  $\text{N}_2$  adsorption-desorption isotherms and b) pore size distribution.

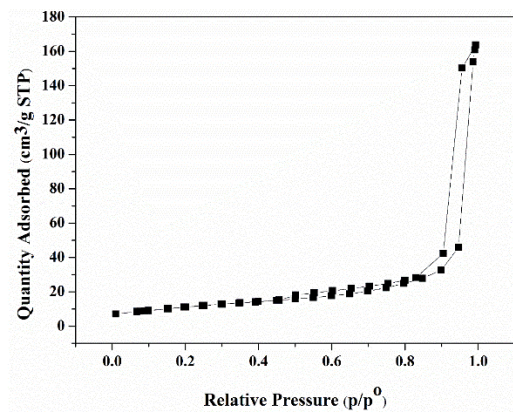

**Figure S4.**  $\text{N}_2$  adsorption-desorption isotherms of bulk  $\text{Co}_3\text{O}_4$ .



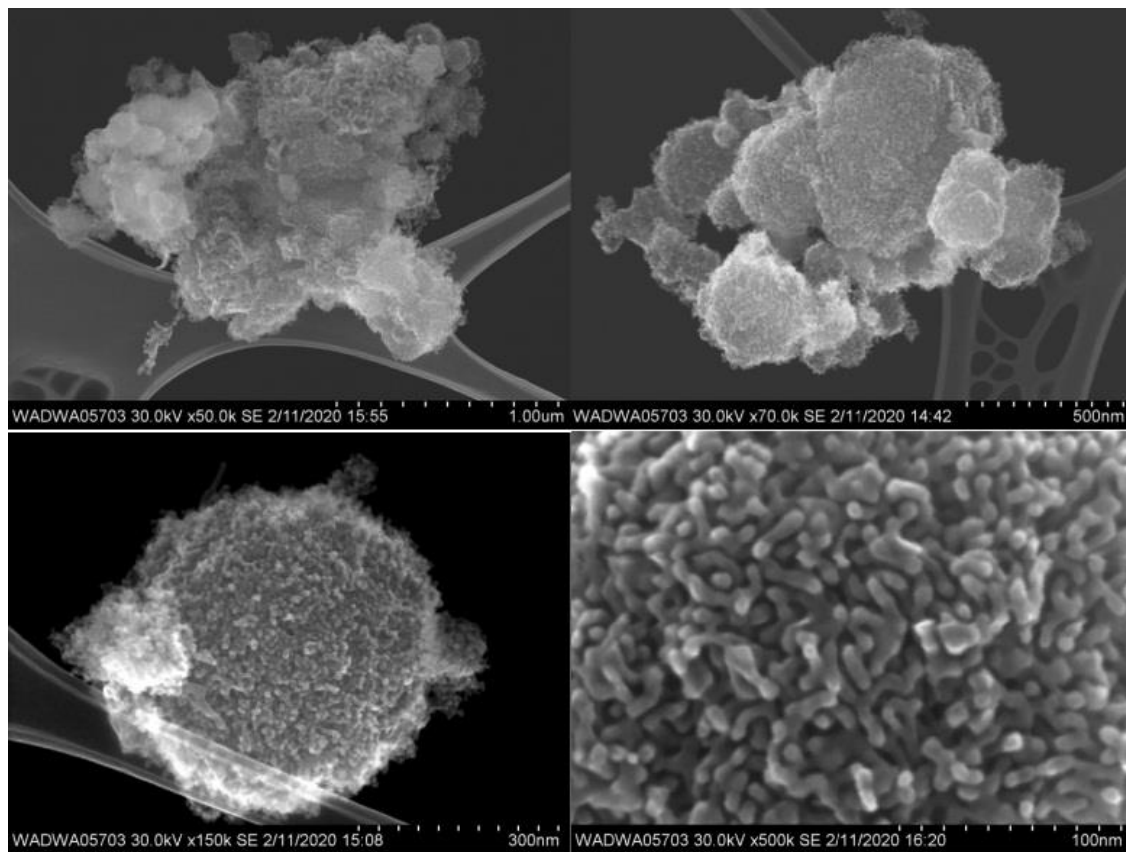

**Figure S5.** SEM images of disordered mesoporous  $\text{Co}_3\text{O}_4$  at different magnification.

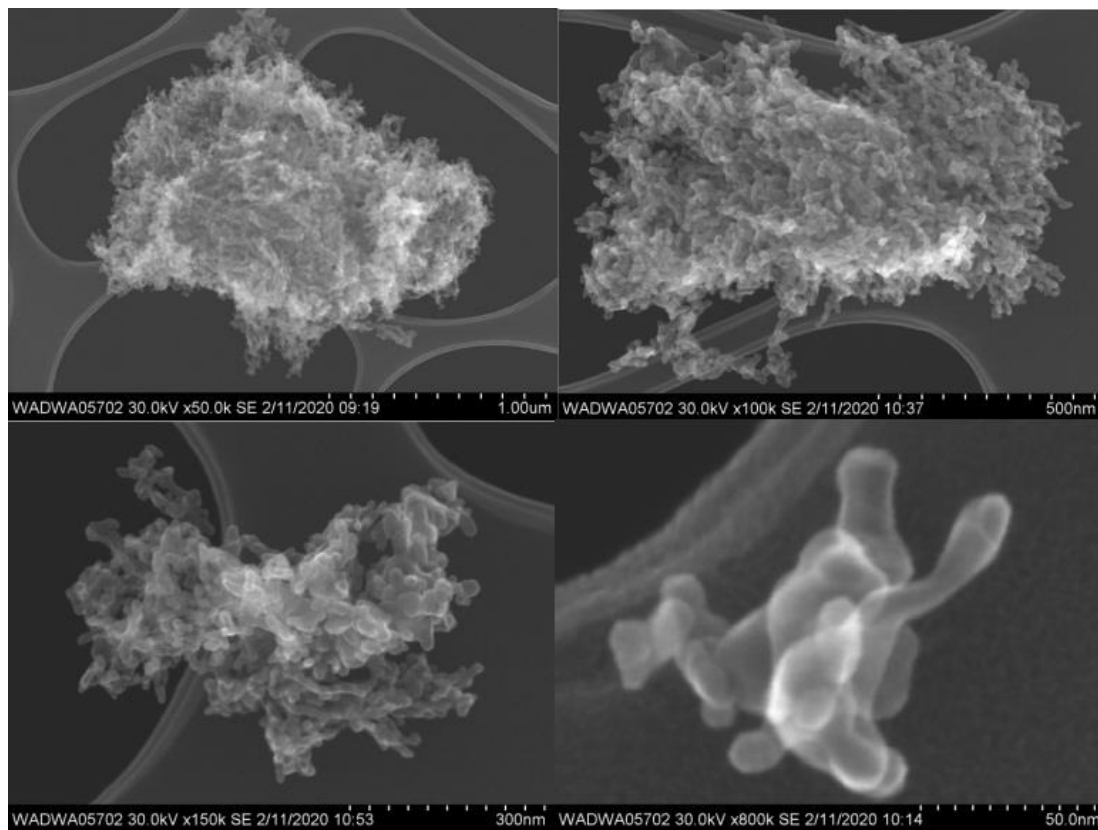

**Figure S6.** SEM images of bulk  $\text{Co}_3\text{O}_4$  at different magnification.

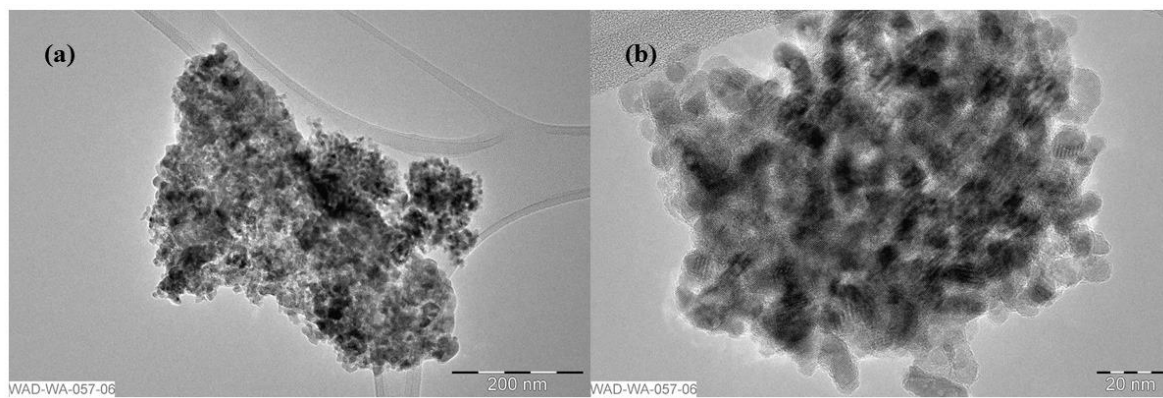

**Figure S7.** TEM images of disordered mesoporous  $\text{Co}_3\text{O}_4$  at different magnification.

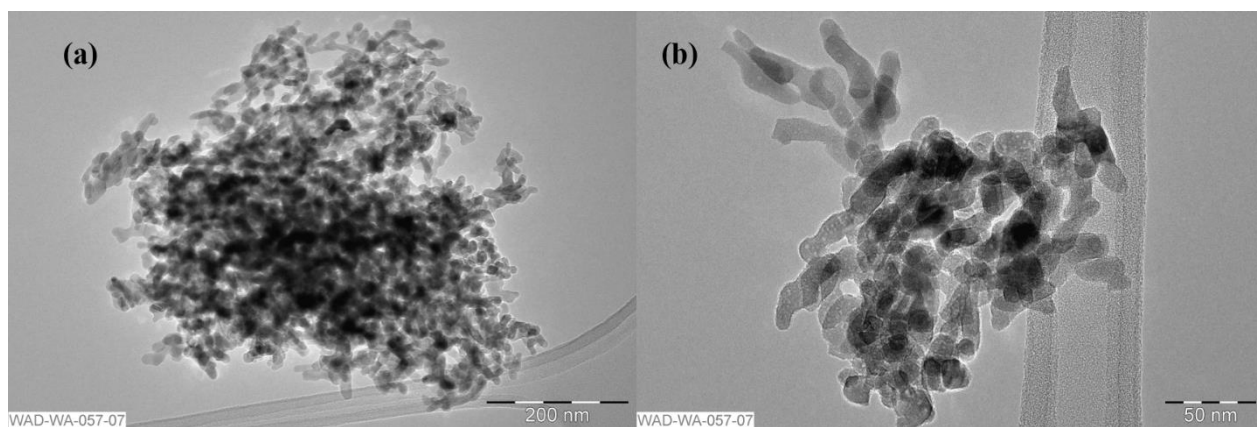

**Figure S8.** TEM images of bulk  $\text{Co}_3\text{O}_4$  at different magnification.

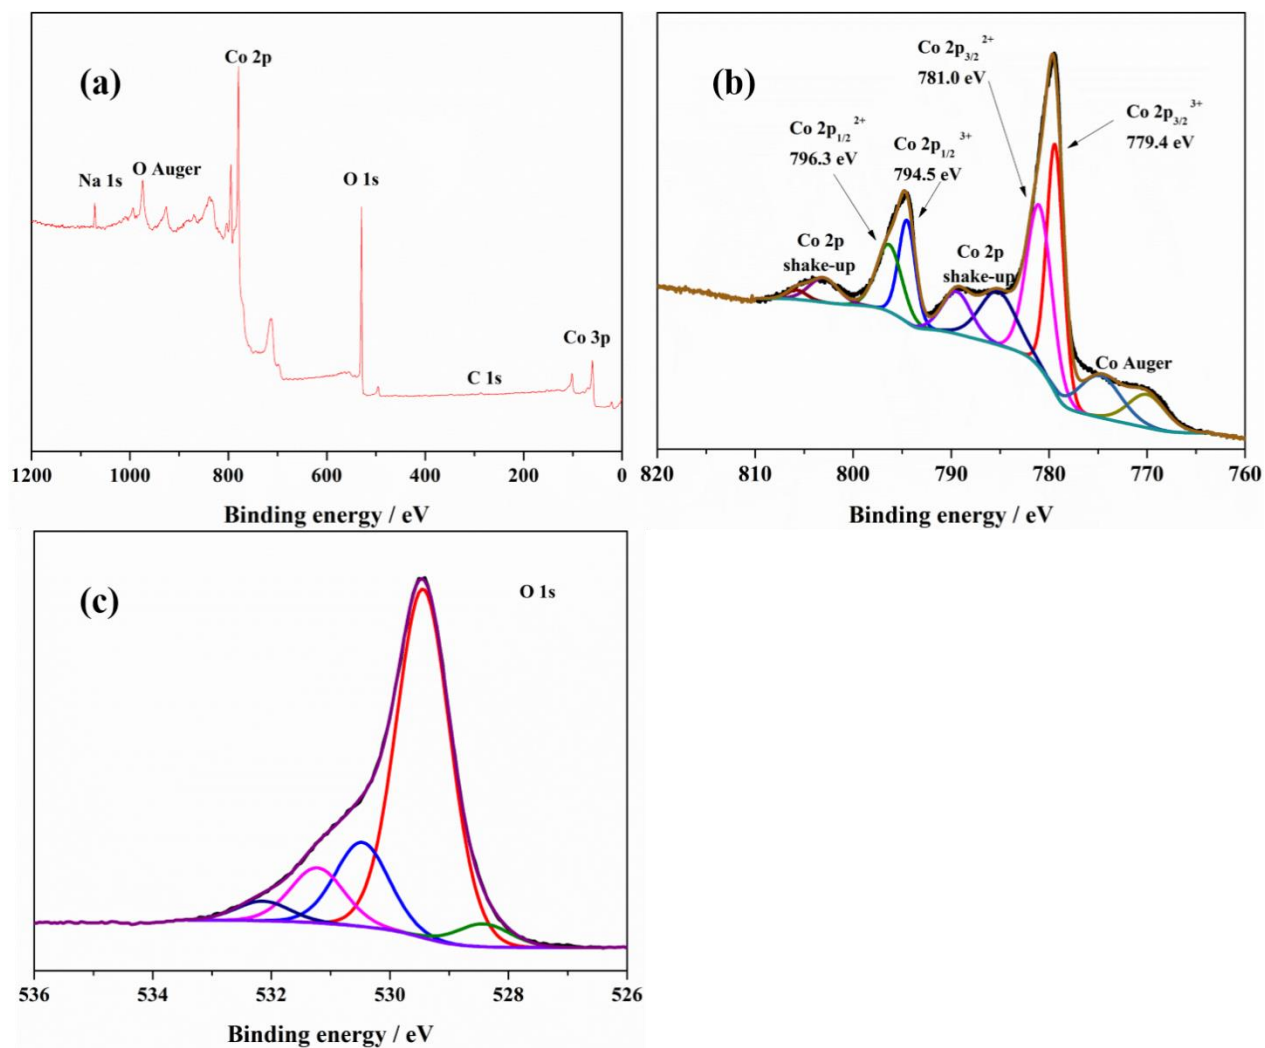

**Figure S9.** XPS analysis of om-Co<sub>3</sub>O<sub>4</sub>. a) XPS survey spectrum. b) Co 2p spectrum. c) O 1s spectrum.

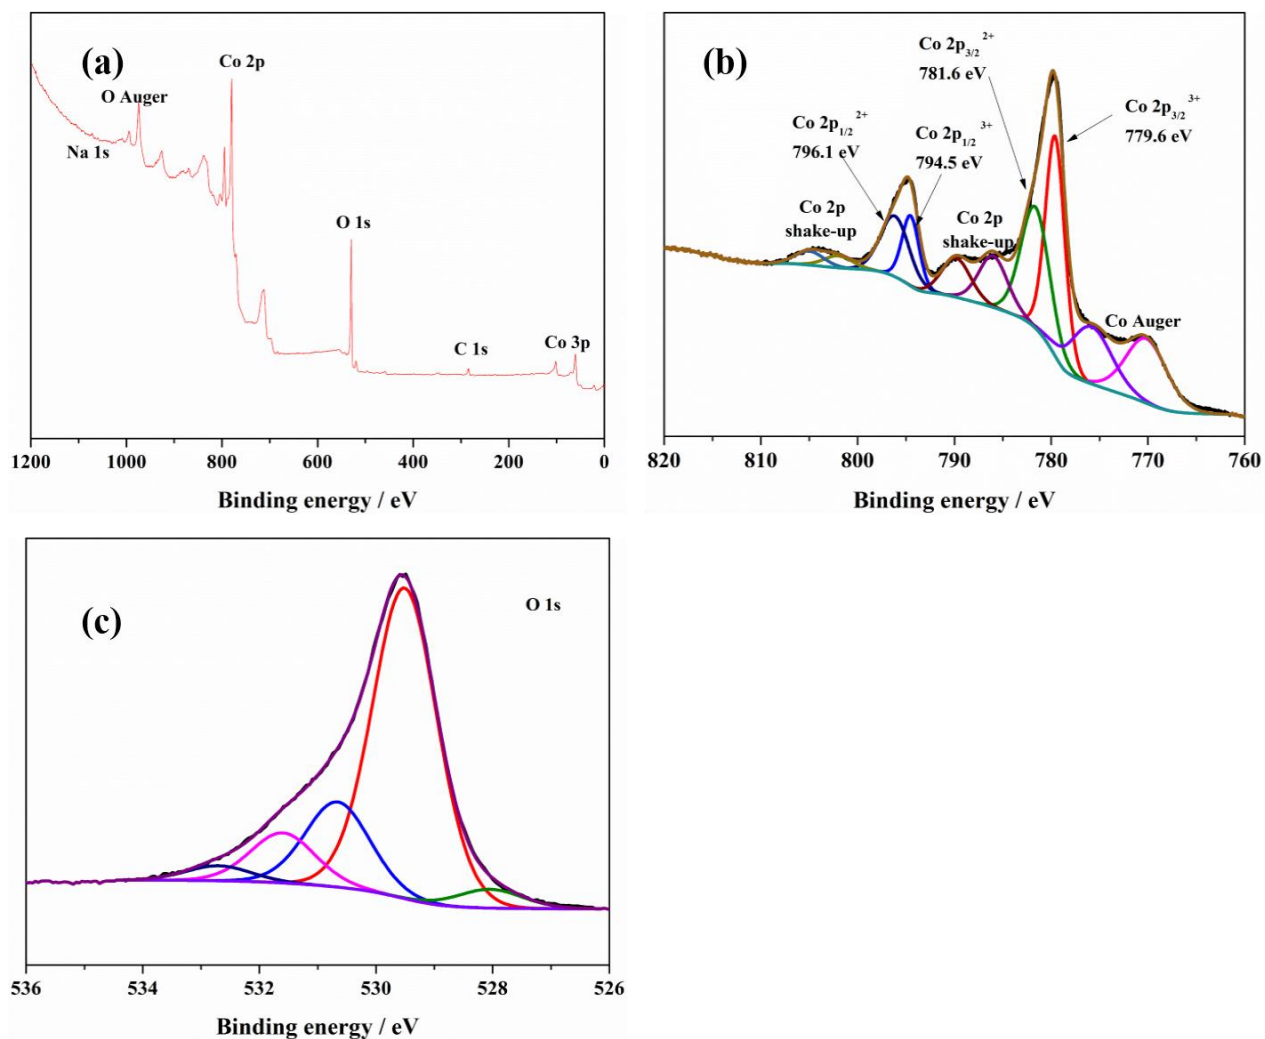

**Figure S10.** XPS analysis of dm-Co<sub>3</sub>O<sub>4</sub>. a) XPS survey spectrum. b) Co 2p spectrum. c) O 1s spectrum.

*Note: These spectra have been measured with non-monochromatic Al-source (100 W).*

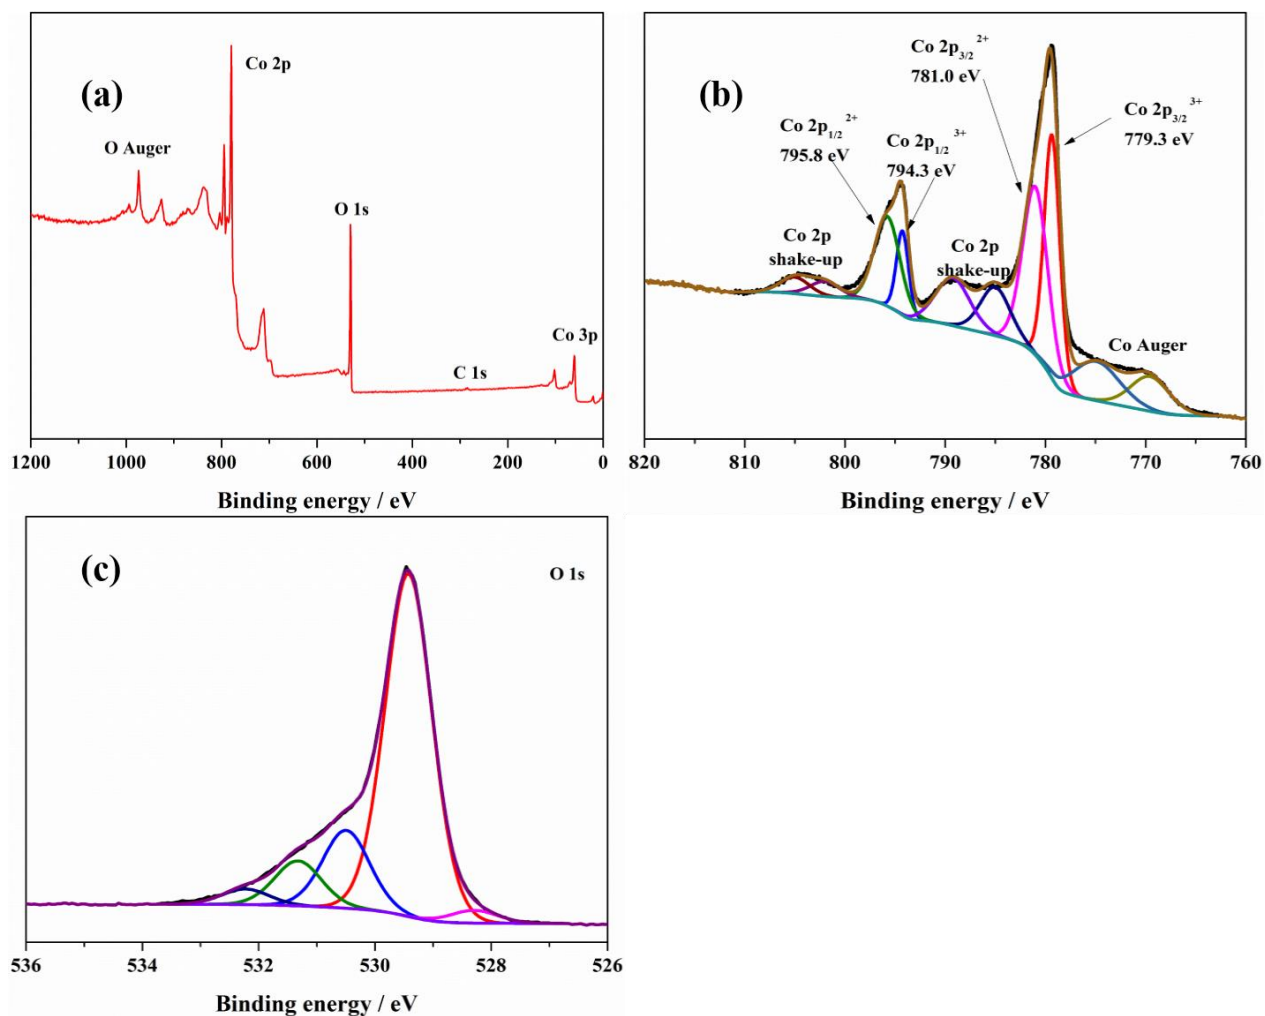

**Figure S11.** XPS analysis of bulk  $\text{Co}_3\text{O}_4$ . a) XPS survey spectrum. b) Co 2p spectrum. c) O 1s spectrum.

### 3. Electrochemical oxidation of HMF.

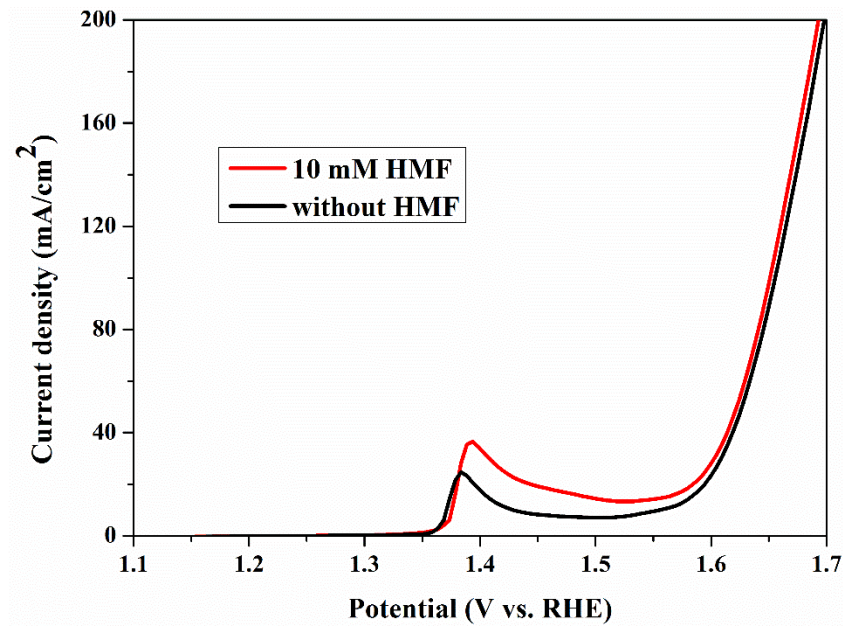

**Figure S12.** LSV curves for nickel foam in 1 M KOH with and without 10 mM HMF.



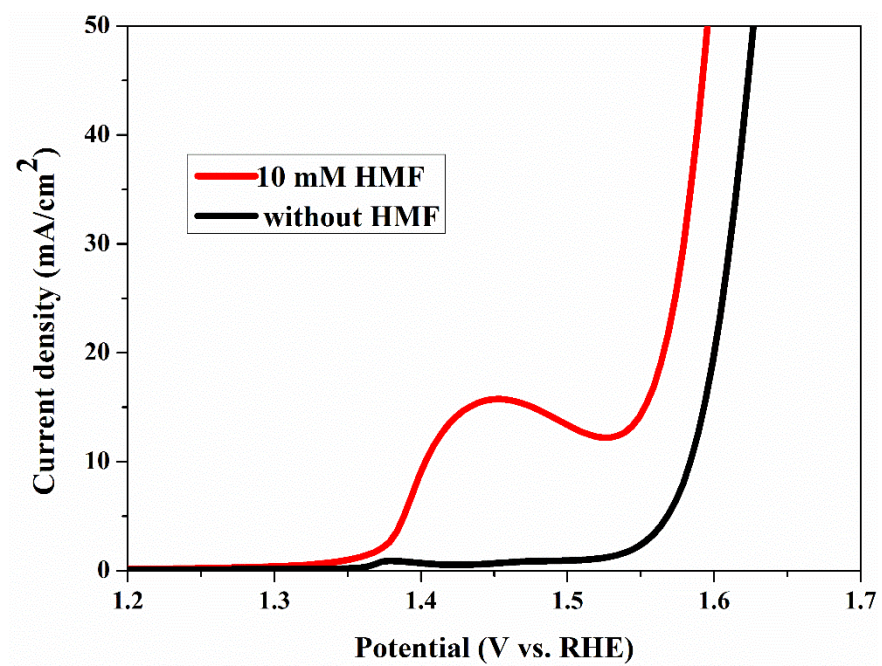

**Figure S13.** LSV curves of dm-Co<sub>3</sub>O<sub>4</sub>/NF in 1 M KOH with and without 10 mM HMF.

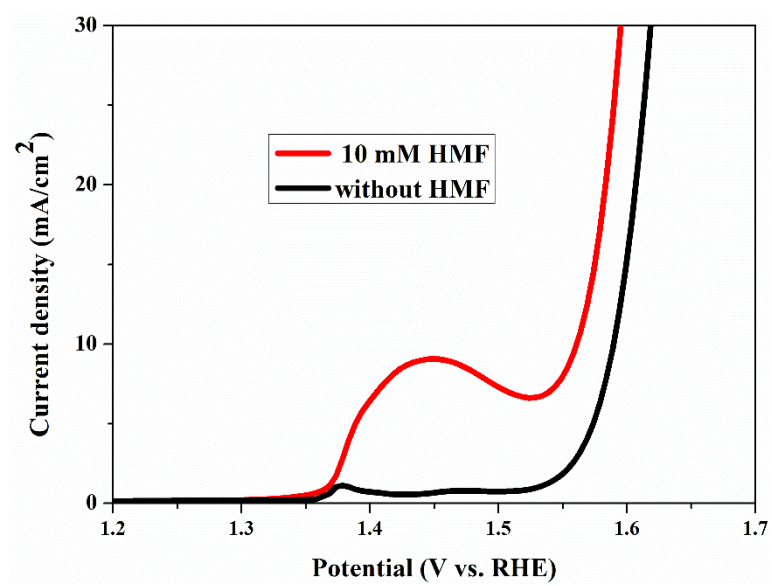

**Figure S14.** LSV curves of bulk  $\text{Co}_3\text{O}_4/\text{NF}$  in 1 M KOH with and without 10 mM HMF.

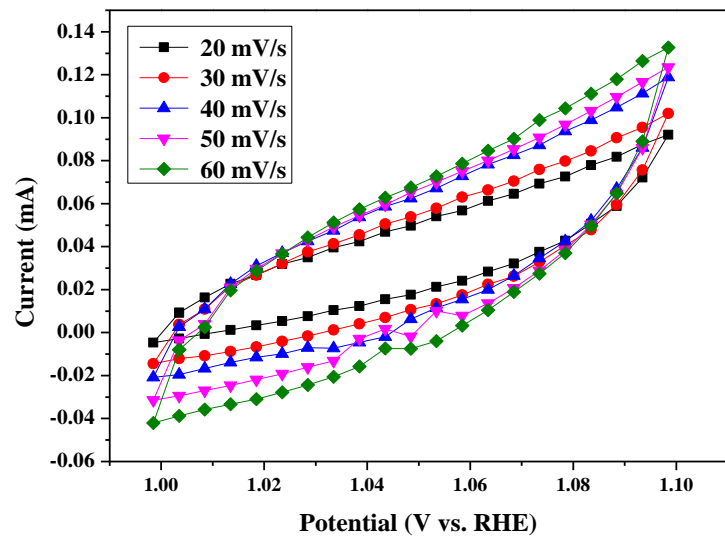

**Figure S15.** CV curves of bulk  $\text{Co}_3\text{O}_4/\text{NF}$  with HMF at different scan rates.

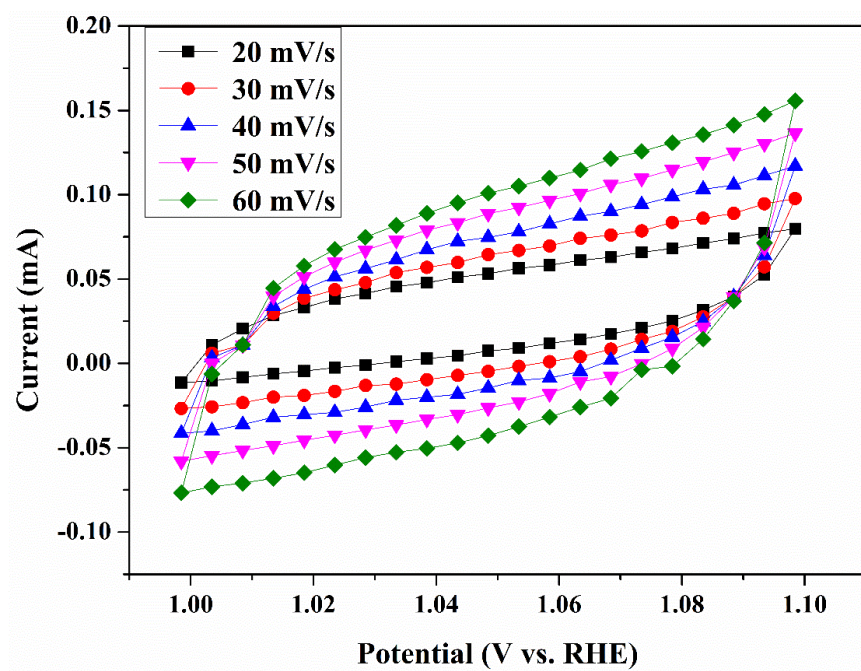

**Figure S16.** CV curves of dm-CO<sub>3</sub>O<sub>4</sub>/NF with HMF at different scan rates.

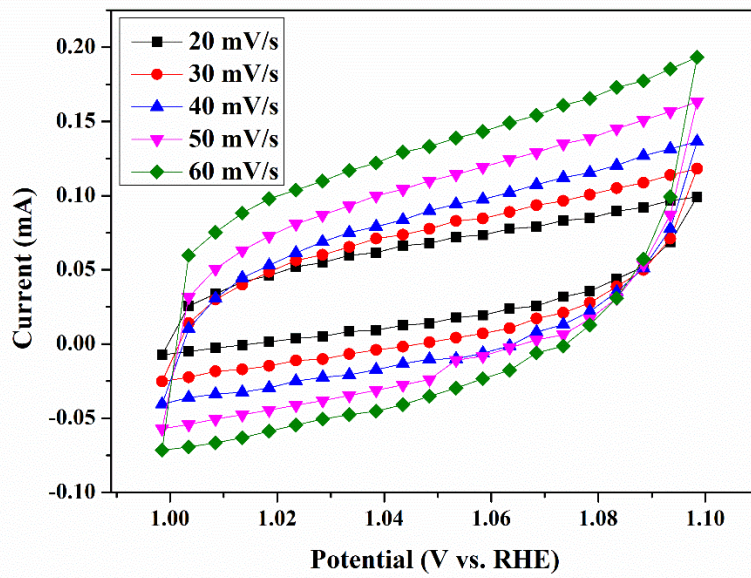

**Figure S17.** CV curves of om-Co<sub>3</sub>O<sub>4</sub>/NF with 10 mM HMF at different scan rate.

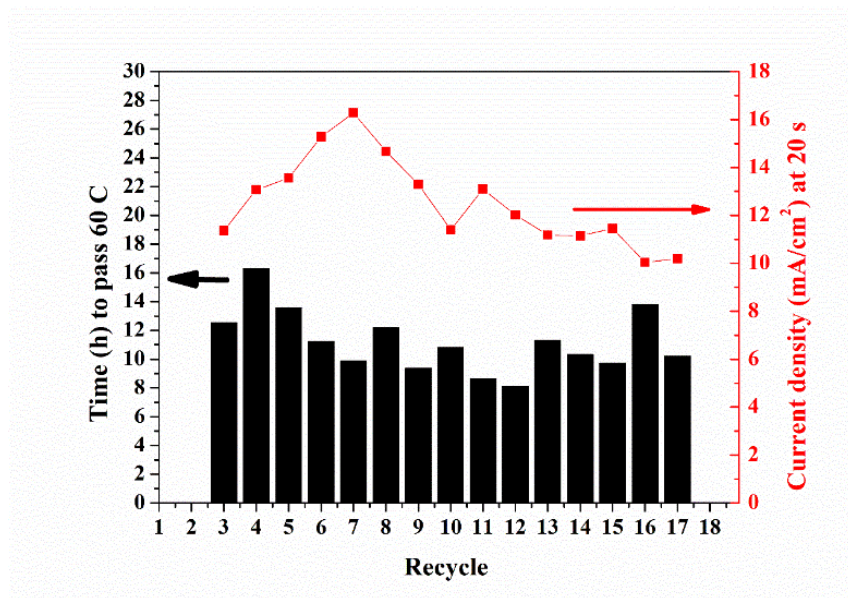

**Figure S18:** The times required to pass 60 C and the initial current densities for different cycles.



#### 4. Characterizations of om- $\text{Co}_3\text{O}_4$ catalyst after electrochemical oxidation of HMF.

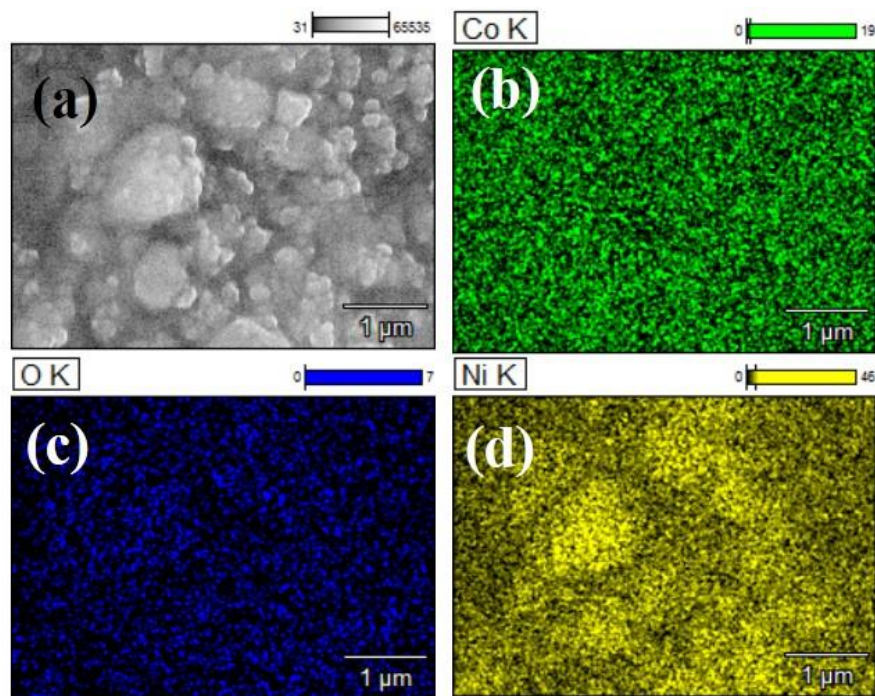

**Figure S19.** Structural characterizations of om- $\text{Co}_3\text{O}_4$ /NF electrode after 17 times of electrolysis. a) low-magnification SEM images. b-d) the corresponding elemental mappings of Co, O and Ni.

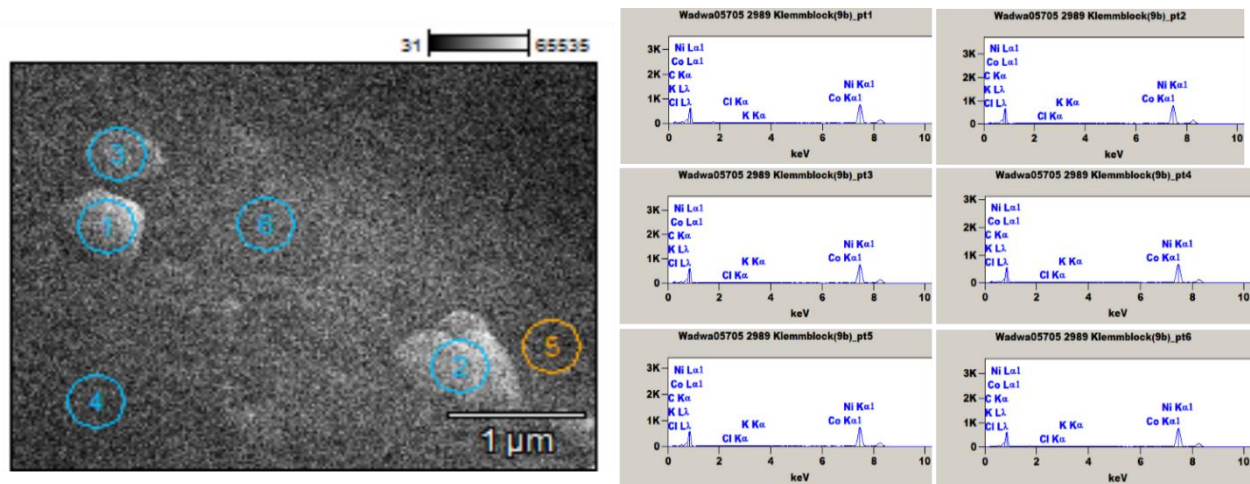

Atom- %

|                                           | C-K  | Cl-K | K-K | Co-K | Ni-K |
|-------------------------------------------|------|------|-----|------|------|
| <i>Wadwa05705 2989 Klemmblock(9b)_pt1</i> | 72.8 | 0.3  | 0.2 | 0.2  | 26.5 |
| <i>Wadwa05705 2989 Klemmblock(9b)_pt2</i> | 71.9 | 0.1  | 0.3 | 0.2  | 27.5 |
| <i>Wadwa05705 2989 Klemmblock(9b)_pt3</i> | 70.9 | 0.0  | 0.2 | 0.2  | 28.7 |
| <i>Wadwa05705 2989 Klemmblock(9b)_pt4</i> | 71.7 | 0.0  | 0.2 | 0.2  | 27.8 |
| <i>Wadwa05705 2989 Klemmblock(9b)_pt5</i> | 69.1 | 0.2  | 0.1 | 0.2  | 30.4 |
| <i>Wadwa05705 2989 Klemmblock(9b)_pt6</i> | 72.6 | 0.1  | 0.2 | 0.1  | 26.9 |

Atom-% Fehler (+/- 2 Sigma)

|                                           | C-K  | Cl-K | K-K  | Co-K | Ni-K |
|-------------------------------------------|------|------|------|------|------|
| <i>Wadwa05705 2989 Klemmblock(9b)_pt1</i> | ±6.8 | ±0.2 | ±0.1 | ±0.1 | ±0.8 |
| <i>Wadwa05705 2989 Klemmblock(9b)_pt2</i> | ±7.3 | ±0.2 | ±0.1 | ±0.1 | ±0.8 |
| <i>Wadwa05705 2989 Klemmblock(9b)_pt3</i> | ±7.4 | ±0.2 | ±0.1 | ±0.1 | ±0.8 |
| <i>Wadwa05705 2989 Klemmblock(9b)_pt4</i> | ±7.9 | ±0.2 | ±0.1 | ±0.1 | ±0.9 |
| <i>Wadwa05705 2989 Klemmblock(9b)_pt5</i> | ±8.0 | ±0.2 | ±0.1 | ±0.2 | ±0.9 |
| <i>Wadwa05705 2989 Klemmblock(9b)_pt6</i> | ±9.5 | ±0.2 | ±0.1 | ±0.1 | ±0.8 |

**Figure S20.** Point and shoot analyses at different places of om-Co<sub>3</sub>O<sub>4</sub>/NF electrode after 17 times of electrolysis.



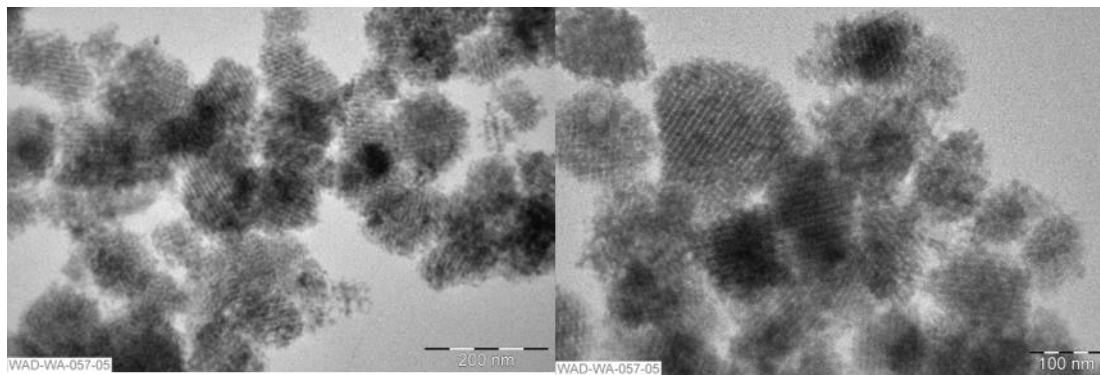

**Figure S21.** TEM images of om-Co<sub>3</sub>O<sub>4</sub> on Lacey film after washing from NF at different magnification (after 17 chronoamperometric runs).
